# Supplementary material
Source: PubMed Central journal article supplement (PMC2663618)
Supplement: 2008.000927_1.pdf [file 2008.000927_1.pdf]

# Risk factors for therapy-related myelodysplastic syndrome and acute myeloid leukemia treated with allogeneic stem cell transplantation

Nicolaus Kröger,<sup>1</sup> Ronald Brand,<sup>2</sup> Anja van Biezen,<sup>2</sup> Axel Zander,<sup>1</sup> Judith Dierlamm,<sup>3</sup> Dietger Niederwieser,<sup>4</sup> Agnès Devergie,<sup>5</sup> Tapani Ruutu,<sup>6</sup> Jackie Cornish,<sup>7</sup> Per Ljung-man,<sup>8</sup> Alois Gratwohl,<sup>9</sup> Catherine Cordonnier,<sup>10</sup> Dietrich Beelen,<sup>11</sup> Eric Deconinck,<sup>12</sup> Argiris Symeonidis,<sup>13</sup> and Theo de Witte;<sup>14</sup> for the Myelodysplastic Syndromes Subcommittee of The Chronic Leukaemia Working Party of the European Group for Blood and Marrow Transplantation (EBMT)

<sup>1</sup>Dept. for Stem Cell Transplantation, University Hospital Hamburg-Eppendorf, Germany; <sup>2</sup>Dept. of Medical Statistics, Leiden University, Leiden, The Netherlands; <sup>3</sup>Dept. of Haematology and Oncology, University Hospital Hamburg-Eppendorf, Germany; <sup>4</sup>Dept. of Haematology and Oncology, University of Leipzig, Germany; <sup>5</sup>Dept. of Hematology, BMT, Hôpital St. Louis, Paris, France; <sup>6</sup>Dept. of Medicine, Helsinki University Central Hospital, Helsinki, Finland; <sup>7</sup>Dept. of Paediatric Oncology/BMT, Bristol Royal Hospital for Children, Bristol, United Kingdom; <sup>8</sup>Dept. of Hematology, Huddinge University Hospital, Huddinge, Sweden; <sup>9</sup>Dept. of Hematology, University Hospital, Basel, Switzerland; <sup>10</sup>Dept. of Hematology, Henri Mondor Teaching Hospital, Creteil, France; <sup>11</sup>Dept. of Bone Marrow Transplantation, University Hospital, Essen, Germany; <sup>12</sup>Dept. of Hematology, Hôpital Jean Minjoz, Besancon, France; <sup>13</sup>Dept of Hematology, University of Patras, Patras, Greece, and <sup>14</sup>Dept. of Hematology, University Medical Center St. Radboud, Nijmegen, The Netherlands

*Citation: Kröger N, Brand R, van Biezen A, Zander A, Dierlamm J, Niederwieser D, Devergie A, Ruutu T, Cornish J, Ljung-man P, Gratwohl A, Cordonnier C, Beelen D, Deconinck E, Symeonidis A, de Witte T for the Myelodysplastic Syndromes Subcommittee of The Chronic Leukaemia Working Party of the European Group for Blood and Marrow Transplantation (EBMT). Risk factors for therapy-related myelodysplastic syndrome and acute myeloid leukemia treated with allogeneic stem cell transplantation. Haematologica 2009; doi:10.3324/haematol.2008.000927*

## Appendix: Participating centers

|                                                                                      |    |
|--------------------------------------------------------------------------------------|----|
| • E. Gluckman, Hopital St. Louis, Paris, France [207]                                | 23 |
| • T. Ruutu, Helsinki University Central Hospital, Helsinki, Finland [515]            | 20 |
| • T. de Witte, Univ.Med.Cent.St. Radboud, Nijmegen, The Netherlands [237]            | 17 |
| • J. Cornish, Bristol Royal Hospital for Children, Bristol, UK [386]                 | 16 |
| • P. von dem Borne, Leiden University Hospital, Leiden, The Netherlands [203]        | 13 |
| • P. Ljungman, Huddinge University Hospital, Huddinge, Sweden [212]                  | 11 |
| • C. Cordonnier, Hopital Henri Mondor, Creteil, France [252]                         | 11 |
| • A. Gratwohl, Kantonsspital, Basel, Switzerland [202]                               | 10 |
| • D. Beelen, University Hospital, Essen, Germany [259]                               | 10 |
| • P. Dufour, Hopital de Hautepierre, Strasbourg, France [672]                        | 10 |
| • S. Slavin, Hadassah University Hospital, Jerusalem, Israel [258]                   | 9  |
| • K. Remes, Turku University Central Hospital, Turku, Finland [225]                  | 8  |
| • E. Deconinck, Hopital Jean Minjoz, Besancon, France [233]                          | 8  |
| • A. Ferrant, Cliniques Universitaires St. Luc, Brussels, Belgium [234]              | 8  |
| • A. Zander, University Hospital Eppendorf, Hamburg, Germany [614]                   | 8  |
| • J. Finke, University of Freiburg, Germany [810]                                    | 7  |
| • E. Alessandrino, Policlinico San Matteo IRCCS, Pavia, Italy [286]                  | 7  |
| • A. Buzyn, Hôpital Necker, Paris, France [160]                                      | 6  |
| • J. Maertens, University Hospital of Leuven, Leuven, Belgium [209]                  | 6  |
| • S. Mackinnon, Royal Free Hospital and School of Med., London, UK [216]             | 6  |
| • A. Bacigalupo, Ospedale San Martino, Genova, Italy [217]                           | 6  |
| • D. Blaise, Institut Paoli Calmettes, Marseille, France [230]                       | 6  |
| • G. Meloni, Univ. "La Sapienza", Rome, Italy [232]                                  | 6  |
| • J. Cornelissen, D.den Hoed Cancer Centre/AZR, Rotterdam, The Netherlands [246]     | 6  |
| • J. Sierra, Hospital Santa Creu I Sant Pau, Barcelona, Spain [260]                  | 6  |
| • J. Passweg, Hopital Cantonal Universitaire, Geneva, Switzerland [261]              | 6  |
| • J.P. Jouet, Hopital Claude Huriez, Lille, France [277]                             | 6  |
| • R. Schots, University Hospital VUB, Brussels, Belgium [630]                        | 6  |
| • J. Apperley, Hammersmith Hospital, London, UK [205]                                | 5  |
| • N. Jacobsen, Rigshospitalet, Copenhagen, Denmark [206]                             | 5  |
| • L. Verdonck, University Medical Centre Utrecht, Utrecht, The Netherlands [239]     | 5  |
| • A. Iriando, Hospital Universitario 'Marqués de Valdecilla', Santander, Spain [242] | 5  |
| • N. Gratecos, Hôpital de l'Arget, Nice, France [523]                                | 5  |
| • L. Bergmann, Universität Ulm, Ulm, Germany [204]                                   | 4  |
| • N. Milpied, Hotel Dieu, Nantes, France [253]                                       | 4  |

|                                                                                         |   |
|-----------------------------------------------------------------------------------------|---|
| • V. Leblond, Pitie-Salpetriere, Paris, France [262]                                    | 4 |
| • F. Guilhot, Hopital La Miletrie, Poitiers, France [264]                               | 4 |
| • M. Michallet, Hopital E. Herriot, Lyon, France [671]                                  | 4 |
| • Dept of Hematology, Hopital d'enfant, Vandoeuvre les Nancy, France [676]              | 4 |
| • A. Wahlin, Umea University Hospital, Umea, Sweden [731]                               | 4 |
| • J. Schubert, University of Saarland – Univ. Hospital, Homburg, Germany [785]          | 4 |
| • G. Ehniger, Universitätsklinikum Dresden, Dresden, Germany [808]                      | 4 |
| • N. Milpied, Hopital Haut-Leveque, Pessac, France [267]                                | 3 |
| • E. Morra, Ospedale di Niguarda Ca'Granda, Milano, Italy, [294]                        | 3 |
| • C. Crawley, Addenbrookes Hospital, Cambridge, United Kingdom [566]                    | 3 |
| • N. Harhalakis, Evangelismos Hospital, Athens, Greece [622]                            | 3 |
| • M. Attal, Hopital de Purpan, Toulouse, France [624]                                   | 3 |
| • A. Rambaldi, Ospedale Bergamo, Bergamo, Italy [658]                                   | 3 |
| • J.H. Bourhis, Institut Gustave Roussy, Villejuif, France [666]                        | 3 |
| • N. Russell, Nottingham City Hospital, Nottingham, UK [717]                            | 3 |
| • W. Arcese, Univ.Tor Vergata, St.Eugenio Hospital, Rome, Italy [756]                   | 3 |
| • I. Espigadot, Hospital 'Virgin del Rocio', Sevilla, Spain [769]                       | 3 |
| • Y. Bertrand, Hopital Debrousse, Lyon, France [806]                                    | 3 |
| • R. Arnold, Charite, Campus Mitte Med. Klinik, Berlin, Germany [807]                   | 3 |
| • F. Ciceri, Isitituto Scientifico H.S.Raffaele, Milano, Italy [813]                    | 3 |
| • N. Gorin, Saint Antoine, Paris, France [213]                                          | 2 |
| • E. Carreras, Hospital Clinic, Barcelona, Spain [214]                                  | 2 |
| • D. Bron, Institut Jules Bordet, Brussels, Belgium [215]                               | 2 |
| • M. Ethell, Royal Marsden Hospital, Sutton, UK [218]                                   | 2 |
| • B. Rio, Hotel Dieu, Paris, France [222]                                               | 2 |
| • I. Franklin, Glasgow Royal Infirmary, Glasgow, Scotland, UK [244]                     | 2 |
| • Dept. of Hematology, St. Etienne, France [250]                                        | 2 |
| • G. Cook, St. James' University Hospital, Leeds, UK [254]                              | 2 |
| • T. Littlewood, The Oxford Radcliffe Hospital, Oxford, UK [255]                        | 2 |
| • G. Lambertenghi Delilieri, Ospedale Maggiore di Milano, Milano, Italy [265]           | 2 |
| • F. Jones, Belfast City Hospital, Belfast, UK [268]                                    | 2 |
| • J. Bay, Centre Jean Perrin, Clermont-Ferrand, France [273]                            | 2 |
| • C. Craddock, Univ. Hosp. Birmingham NHST Trust, Birmingham, UK [387]                  | 2 |
| • A. Fassas, G.P. Gen. Hosp. of Thessaloniki, Exokhi, Greece [561]                      | 2 |
| • C. Urban, University Children`s Hospital, Graz, Austria [593]                         | 2 |
| • A. Schwarzer, Alfred Hospital, Melbourne, Australia [595]                             | 2 |
| • J. Pretnar, University Med. Center, Ljubljana, Slovenia [640]                         | 2 |
| • M. Sanz, Hospital Universitario La Fe,Valencia, Spain [663]                           | 2 |
| • R. Hermann, Royal Perth Hospital, Perth Western Australia, Australia [710]            | 1 |
| • L. Noens, University Hospital Gent, Gent, Belgium [744]                               | 2 |
| • E. Liakopoulou, Christie NHS Trust Hospital, Manchester, United Kingdom [780]         | 2 |
| • M. Martelli, University of Perugia, Perugia, Italy [794]                              | 2 |
| • Dept. of Hematology, Hopital Timone, Marseille, France [192]                          | 1 |
| • M. Falda, Azienda Ospedaliera S. Giovanni, Torino, Italy [231]                        | 1 |
| • J. Fernandez-Ranada, Hospital de la Princesa, Madrid, Spain [236]                     | 1 |
| • J. van der Lelie, Academic Medical Centre, Amsterdam, The Netherlands [247]           | 1 |
| • P. Di Bartolomeo, Ospedale Civile, Pescara, Italy [248]                               | 1 |
| • O. Reman, Centre Hospitalier Universitaire Haematology, Caen, France, [251]           | 1 |
| • J.J. Sotto, Hopital A. Michallon, Grenoble, France [270]                              | 1 |
| • S. Proctor, Royal Victoria Infirmary, Newcastle-upon-Tyne, United Kingdom [276]       | 1 |
| • S. Lenhoff, University Hospital, Lund, Sweden [283]                                   | 1 |
| • I. Majolino, Ospedale S. Camillo, Rome, Italy [287]                                   | 1 |
| • R. Blasczyk, Medical School of Hannover, Hannover, Germany [295]                      | 1 |
| • G. Leone, Universita Cattolica S. Cuore, Rome, Italy [307]                            | 1 |
| • J. Rowe, Rambam Medical Center, Haifa, Israel [345]                                   | 1 |
| • M. Aljurf, King Faisal Specialist Hosp. & Research Centre, Riyahd, Saudi Arabia [397] | 1 |
| • D. Selleslag, A.Z. Sint-Jan, Brugge, Belgium [506]                                    | 1 |
| • H-J. Kolb, Klinikum Grosshadern, München, Germany [513]                               | 1 |
| • A. Ho, University of Heidelberg, Heidelberg, Germany [524]                            | 1 |
| • G. Lucarelli, Pesaro Hospital, Pesaro, Italy [529]                                    | 1 |
| • R. Handgretinger, University Hospital Dept. of Pediatrics, Tübingen, Germany [535]    | 1 |
| • E. Pogliani, Ospedale San Gerardo, Monza, Italy [544]                                 | 1 |
| • G.W. van Imhoff, Univ. Medical Center Groningen, Groningen, The Netherlands [546]     | 1 |

- T. Masszi, National Medical Centre, Budapest, Hungary [556] 1
- F. Locatelli, IRCCS Policlinico San Matteo, Pavia, Italy [557] 1
- H. Schouten, University Hospital Maastricht, Maastricht, The Netherlands [565] 1
- K. Indrák, University Hospital, Olomouc, Czech Republic [574] 1
- M. Freund, Universität Rostock, Rostock, Germany [585] 1
- G. Ossenkoppele, Free University Hosp. A'dam, Amsterdam, The Netherlands [588] 1
- W. Knauf, Klin. Benjamin Franklin, FU Berlin, Berlin, Germany [590] 1
- A. Fauser, Klinik für K.M.T. & Hämato-Onkologie Idar-Oberstein, Germany [592] 1
- R. Lasa Isasti, Hospital Aranzazu, San Sebastian, Spain [598] 1
- A. Gallamini, Az. Ospedaliera S. Croce e Carle, Cuneo, Italy [606] 1
- N. Ifrah, CHRU, Angers, France [650] 1
- V. Castel, Hospital Infantil La Fe, Valencia, Spain [653] 1
- R. Schobess, Martin-Luther-Univ. Halle-Wittenberg, Halle, Germany [654] 1
- R. Fanin, Udine University Hospital, Udine, Italy [705] 1
- B.E. Gibson, Royal Hospital for Sick Children, Glasgow, Scotland, UK [707] 1
- A.E. Hunter, Leicester Royal Infirmary NHS Trust, Leicester, United Kingdom [713] 1
- V. Koza, Charles University Hospital, Pilsen, Czech Republic [718] 1
- J. Besalduch, Hospital Universitari Son Dureta, Palma de Mallorca, Spain [722] 1
- Y. Beguin, University of Liege, Liege, Belgium [726] 1
- D. Caballero, Hospital Clinico, Salamanca, Spain [727] 1
- M. Fernandez, Clinica Puerta de Hierro, Madrid, Spain [728] 1
- G. Juliusson, University Hospital Linköping, Linköping, Sweden [740] 1
- A. Efremidis, St.Savas Onc. Hosp. Hellenic Cancer Institute, Athens, Greece [751] 1
- I. Yaniv, Schneider Children's Medical Center, Petach-Tikva, Israel [755] 1
- B. Rotoli, "Federico II" Medical School/University of Napoli, Napoli, Italy [766] 1
- J. Gribben, St.Batholomew's and the Royal London Hospital, London, UK [768] 1
- A. O'Meara, Our Lady's Hospital for Sick Children, Dublin, Ireland [774] 1
- J. Snowden, Royal Hallamshire Hospital, Sheffield, United Kingdom [778] 1
- R. Giustolisi, University of Catania, Catania, Italy [792] 1
- J.L. Diez-Martin, Hospital G.U. Gregorio Maranon, Madrid, Spain [819] 1
- Dept of Hematology, Hopital Charles Nicolle, Rouen, France [932] 1
- Dept. of Hematology, Hopital Hautepierre, Strasbourg, France [953] 1
- A. Delmer, Hôpital Robert Debre, Reims, France [959] 1
